# Supplementary material for: Low-cost, flexible, disinfectant-free and regular-array three-dimensional nanopyramid antibacterial films for clinical applications
Source: Royal Society of Chemistry journal article supplement (doi:10.1039/c8nr01968a), 2018-01-01
Supplement: c8nr01968a1.pdf [file c8nr01968a1.pdf]

## Supporting Information

### Low-cost, Flexible and Regular-array Three-dimensional Nanopyramid Antibacterial Films for Clinical Applications

Kwong-Hoi Tsui<sup>1†</sup>, Xin Li<sup>2, 4†</sup>, James K.H. Tsoi<sup>3</sup>, Siu-Fung Leung<sup>1</sup>, Lei Tang<sup>1</sup>, Wing Yi Chak<sup>1</sup>, Chengfei Zhang<sup>2</sup>, Jiang Chen<sup>4</sup>, Gary S.P. Cheung<sup>2\*</sup>, Zhiyong Fan<sup>1\*</sup>

<sup>1</sup> Department of Electronic and Computer Engineering, The Hong Kong University of Science and Technology, Clear Water Bay, Kowloon, Hong Kong SAR, China

<sup>2</sup> Discipline of Endodontology, Faculty of Dentistry, The University of Hong Kong, Sai Ying Pun, Hong Kong SAR, China

<sup>3</sup> Dental Materials Science, Faculty of Dentistry, The University of Hong Kong, Sai Ying Pun, Hong Kong SAR, China

<sup>4</sup> Department of Oral Implantology, Affiliated Stomatological of Fujian Medical University, Fuzhou, Fujian 350002, China

\* Corresponding author: [eezfan@ust.hk](mailto:eezfan@ust.hk), [spcheung@hku.hk](mailto:spcheung@hku.hk)

† These authors (K-H Tsui and X. Li) contribute equally

### List of Contents

1. Summary of CLSM result. a) Summary of Live *E.coli* and b) Summary of Dead *E.coli*

## Supplementary Information

**a**

Number of Live *E.coli*

| x10 <sup>3</sup> | <u>Planar</u> | <u>NPA</u>  | <u>NPB</u>  | <u>NPC</u>  |
|------------------|---------------|-------------|-------------|-------------|
| 1-hr             | 17.3 (±0.18)  | 2.0 (±0.02) | 1.5 (±0.02) | 1.5 (±0.02) |
| 24-hr            | 59.4 (±1.18)  | 2.3 (±0.02) | 2.0 (±0.03) | 1.4 (±0.02) |
| 72-hr            | 26.6 (±0.34)  | 0.4 (±0.01) | 0.6 (±0.03) | 1.2 (±0.03) |
| 168-hr           | 61.5 (±0.58)  | 3.6 (±0.05) | 3.3 (±0.07) | 5.7 (±0.04) |

**b**

Number of Dead *E.coli*

| x10 <sup>3</sup> | <u>Planar</u> | <u>NPA</u>  | <u>NPB</u>  | <u>NPC</u>  |
|------------------|---------------|-------------|-------------|-------------|
| 1-hr             | 0.2 (±0.00)   | 0.2 (±0.01) | 0.1 (±0.00) | 0.1 (±0.00) |
| 24-hr            | 0.0 (±0.00)   | 0.3 (±0.01) | 0.3 (±0.01) | 0.2 (±0.00) |
| 72-hr            | 0.8 (±0.03)   | 0.6 (±0.02) | 0.7 (±0.03) | 1.2 (±0.03) |
| 168-hr           | 0.1 (±0.00)   | 2.8 (±0.07) | 2.8 (±0.03) | 5.8 (±0.02) |

**Supporting information Table S1** Summary of CLSM result. a) Summary of Live *E.coli* and b) Summary of Dead *E.coli*
